# Supplementary material for: Radiation sensitivity tests of the HARMONIE 37h1 NWP model
Source: Copernicus journal article supplement (doi:10.5194/gmd-7-1433-2014), 2014-07-16
Supplement: Supplementary file 2 [file gmd-7-1433-2014-supplement.zip]

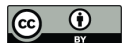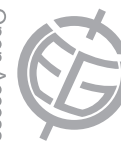

## *Supplement of*

# **Radiation sensitivity tests of the HARMONIE 37h1 NWP model**

**K. P. Nielsen et al.**

*Correspondence to:* K. P. Nielsen ([kpn@dmi.dk](mailto:kpn@dmi.dk))

- Supplement-Cover-Letter.pdf
- Nielsen\_et\_al\_2014\_Supplement\_1.pdf
- Nielsen\_et\_al\_2014\_Supplement\_2.pdf
