# Supplementary material for: Radiation sensitivity tests of the HARMONIE 37h1 NWP model
Source: Copernicus journal article supplement (doi:10.5194/gmd-7-1433-2014), 2014-07-16
Supplement: Supplementary file 4 [file gmd-7-1433-2014-supplement.zip]

Archive with 3 entries (3 files):
- supplement-cover-letter.pdf
- Nielsen_et_al_2014_Supplement_2.pdf
- Nielsen_et_al_2014_Supplement_1.pdf
